# Supplementary figures and images for: Self-assembly of Hyaluronic Acid-Cu-Quercetin flavonoid nanoparticles: synergistic chemotherapy to target tumors
Source: PeerJ journal article supplement (doi:10.7717/peerj.15942), 2023-08-28

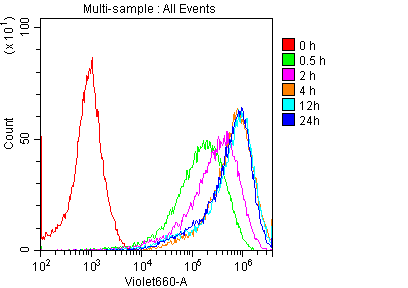


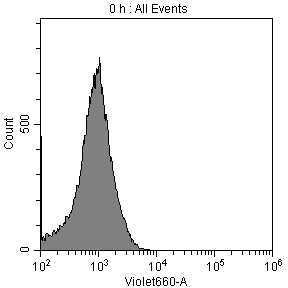


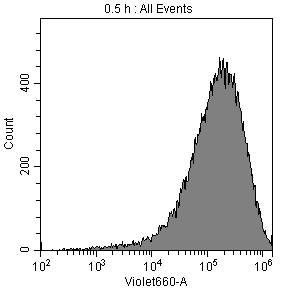


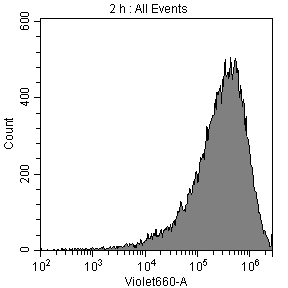


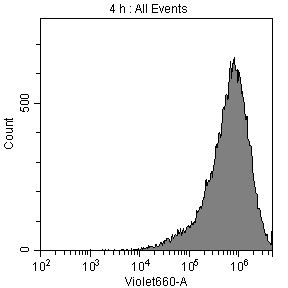


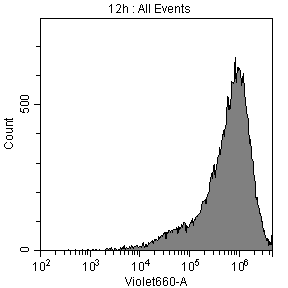


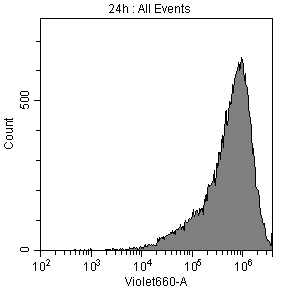


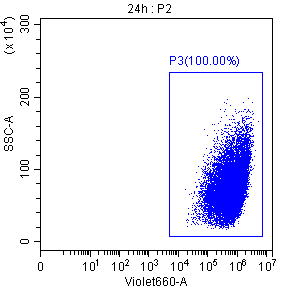

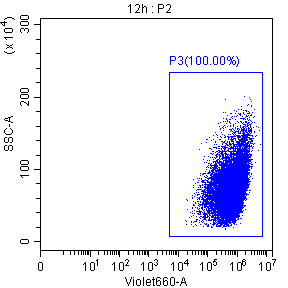

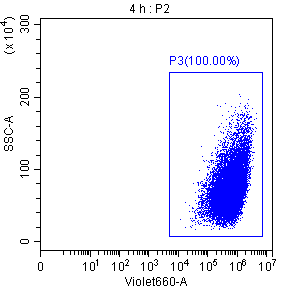

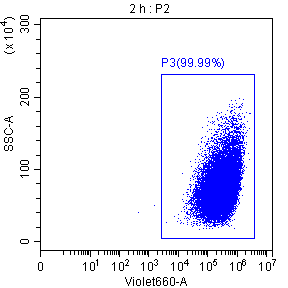

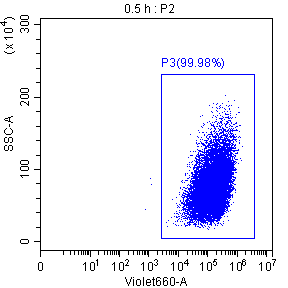

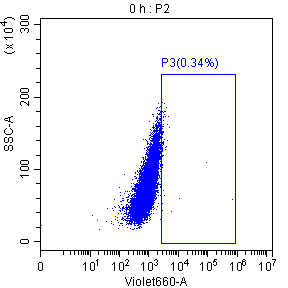

Supplement: RawData.zip [file RawData.zip]
